# Supplementary material for: Microfluidic-based in vitro thrombosis model for studying microplastics toxicity
Source: Royal Society of Chemistry journal article supplement (doi:10.1039/d1lc00989c), 2022-01-01
Supplement: d1lc00989c1.pdf [file d1lc00989c1.pdf]

## Supplementary Information for Microfluidic-based in vitro thrombosis model for studying the microplastics toxicity

Longfei Chen,<sup>†ab</sup> Yajing Zheng,<sup>†c</sup> Yantong Liu,<sup>ab</sup> Pengfu Tian,<sup>a</sup> Le Yu,<sup>a</sup> Long Bai,<sup>d</sup> Fuling Zhou,<sup>c</sup> Yi Yang,<sup>ab\*</sup> Yanxiang Cheng,<sup>c\*</sup> Fubing Wang,<sup>f</sup> Li Zheng,<sup>g</sup> Fenghua Jiang,<sup>g</sup> Yimin Zhu,<sup>d</sup>

<sup>a</sup>Key Laboratory of Artificial Micro- and Nano- Structures of Ministry of Education, School of Physics & technology, Wuhan University, Wuhan 430072, China.

<sup>b</sup>Shenzhen Research Institute, Wuhan University, Shenzhen 518000, China.

<sup>c</sup>Department of Obstetrics and Gynecology, Renmin Hospital of Wuhan University, Wuhan 430060, China

<sup>d</sup>School of Medicine, Zhejiang University, Hangzhou, Zhejiang 310002, China.

<sup>e</sup>Department of Hematology, Zhongnan Hospital, Wuhan University, Wuhan 430071, China.

<sup>f</sup>Department of Laboratory Medicine, Zhongnan Hospital, Wuhan University, Wuhan 430071, China.

<sup>g</sup>Institute of Oceanology, Chinese Academy of Sciences, Qingdao 266061, China.

Email: [yangyiys@whu.edu.cn](mailto:yangyiys@whu.edu.cn)  
[yanxiangcheng@whu.edu.cn](mailto:yanxiangcheng@whu.edu.cn)

### This PDF file includes:

Figures S1 to S7

## Supplementary Figures

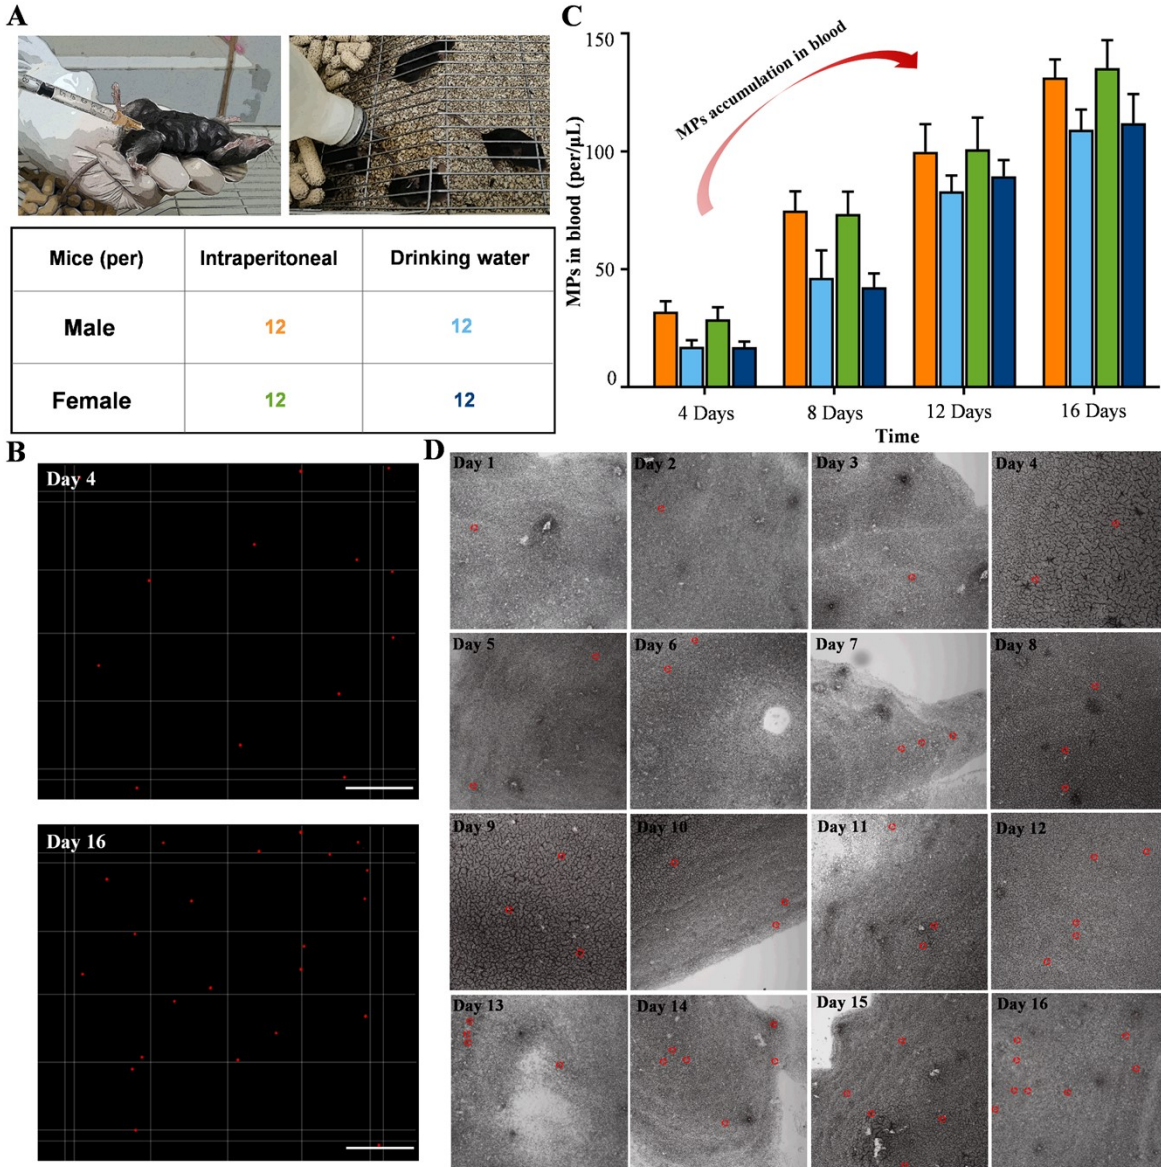

**Fig. S1.** The evaluation of MPs accumulation risk in vivo mice experiments. (a) Experimental design of micro-plastic peritoneal mucosal and intestinal transferring. (b) Confocal micrograph of counting MPs particles in blood. Scale bar: 250 $\mu\text{m}$ . (c) Histogram of accumulated MPs in four experimental groups. (d) Micrograph of MPs in blood with increasing time.

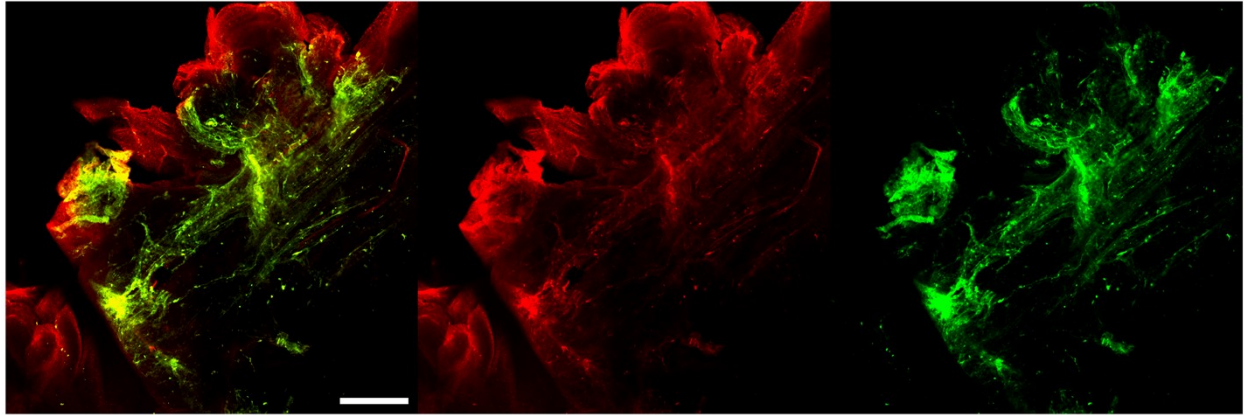

Fluorescent area:  
 $7.21 \times 10^5 \mu\text{m}^2$   
Mean value:  
36.713

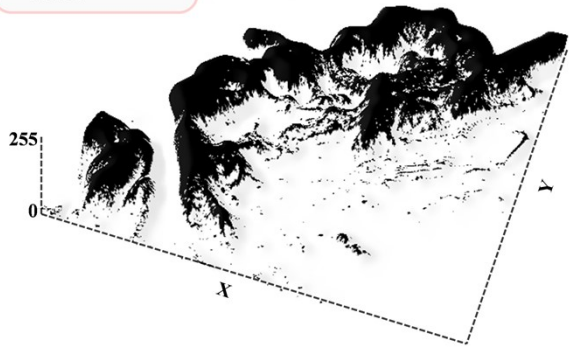

Fluorescent area:  
 $5.04 \times 10^5 \mu\text{m}^2$   
Mean value:  
18.280

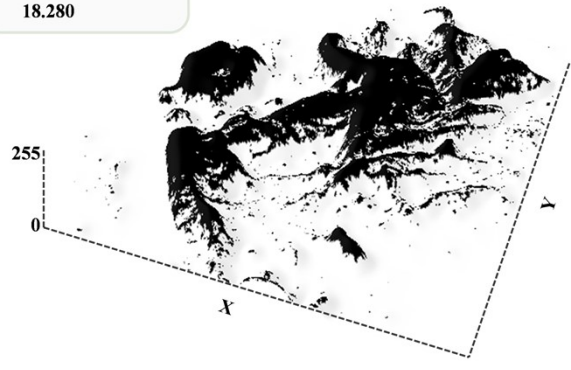

Fig. S2. The fluorescent analysis of normal thrombus. Laser confocal micrograph of normal thrombus, and 3D fluorescence intensity distribution map between PLT, FIB. Scale bar: 300 $\mu\text{m}$ .

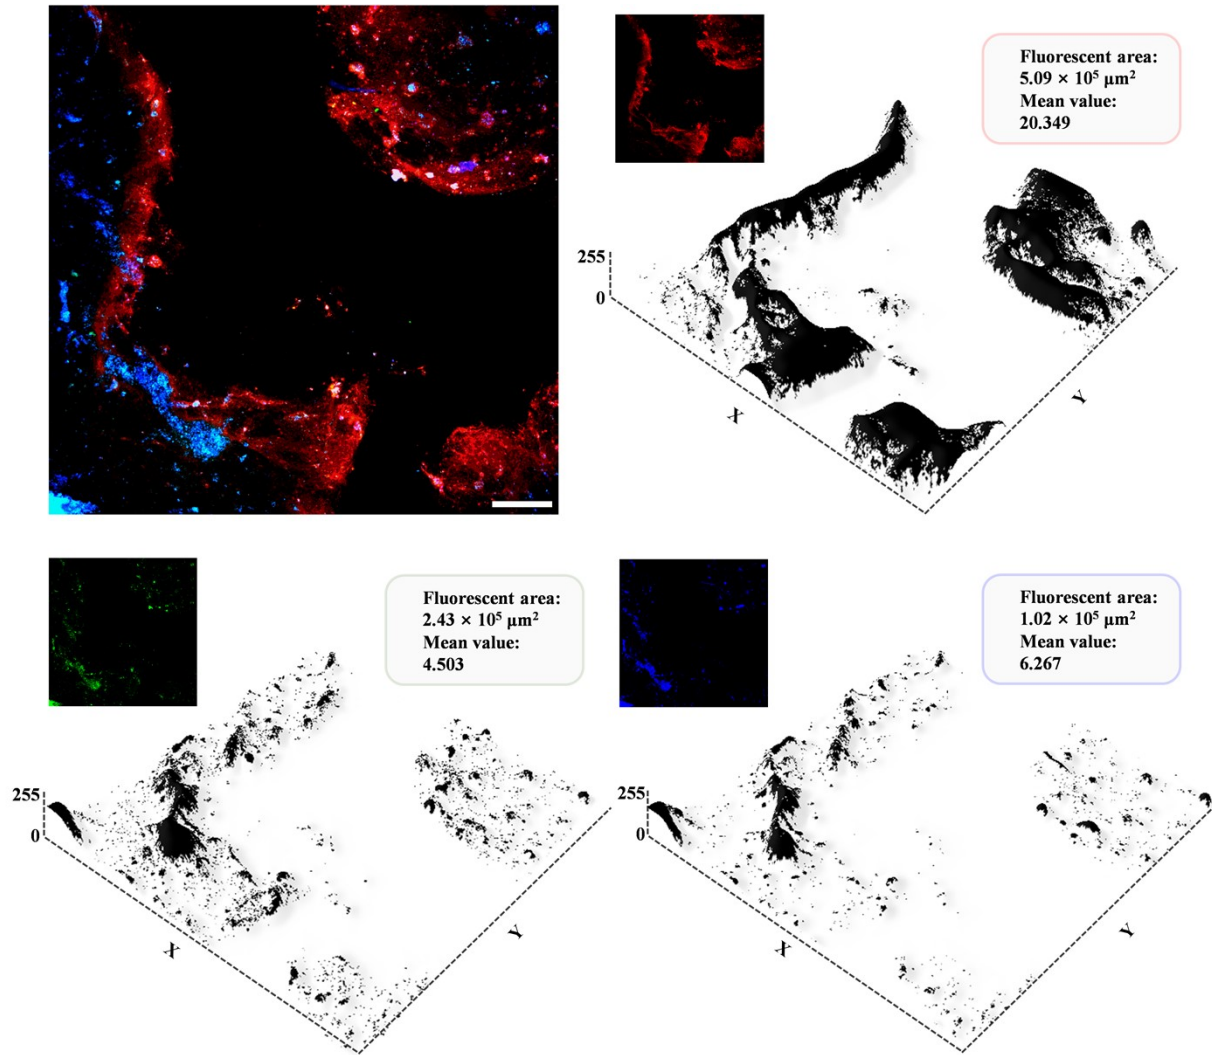

**Fig. S3.** The fluorescent analysis of MPs invasion. Laser confocal micrograph of MPs invasion, and 3D fluorescence intensity distribution map between PLT, FIB, MPs. Scale bar: 200 $\mu\text{m}$ .

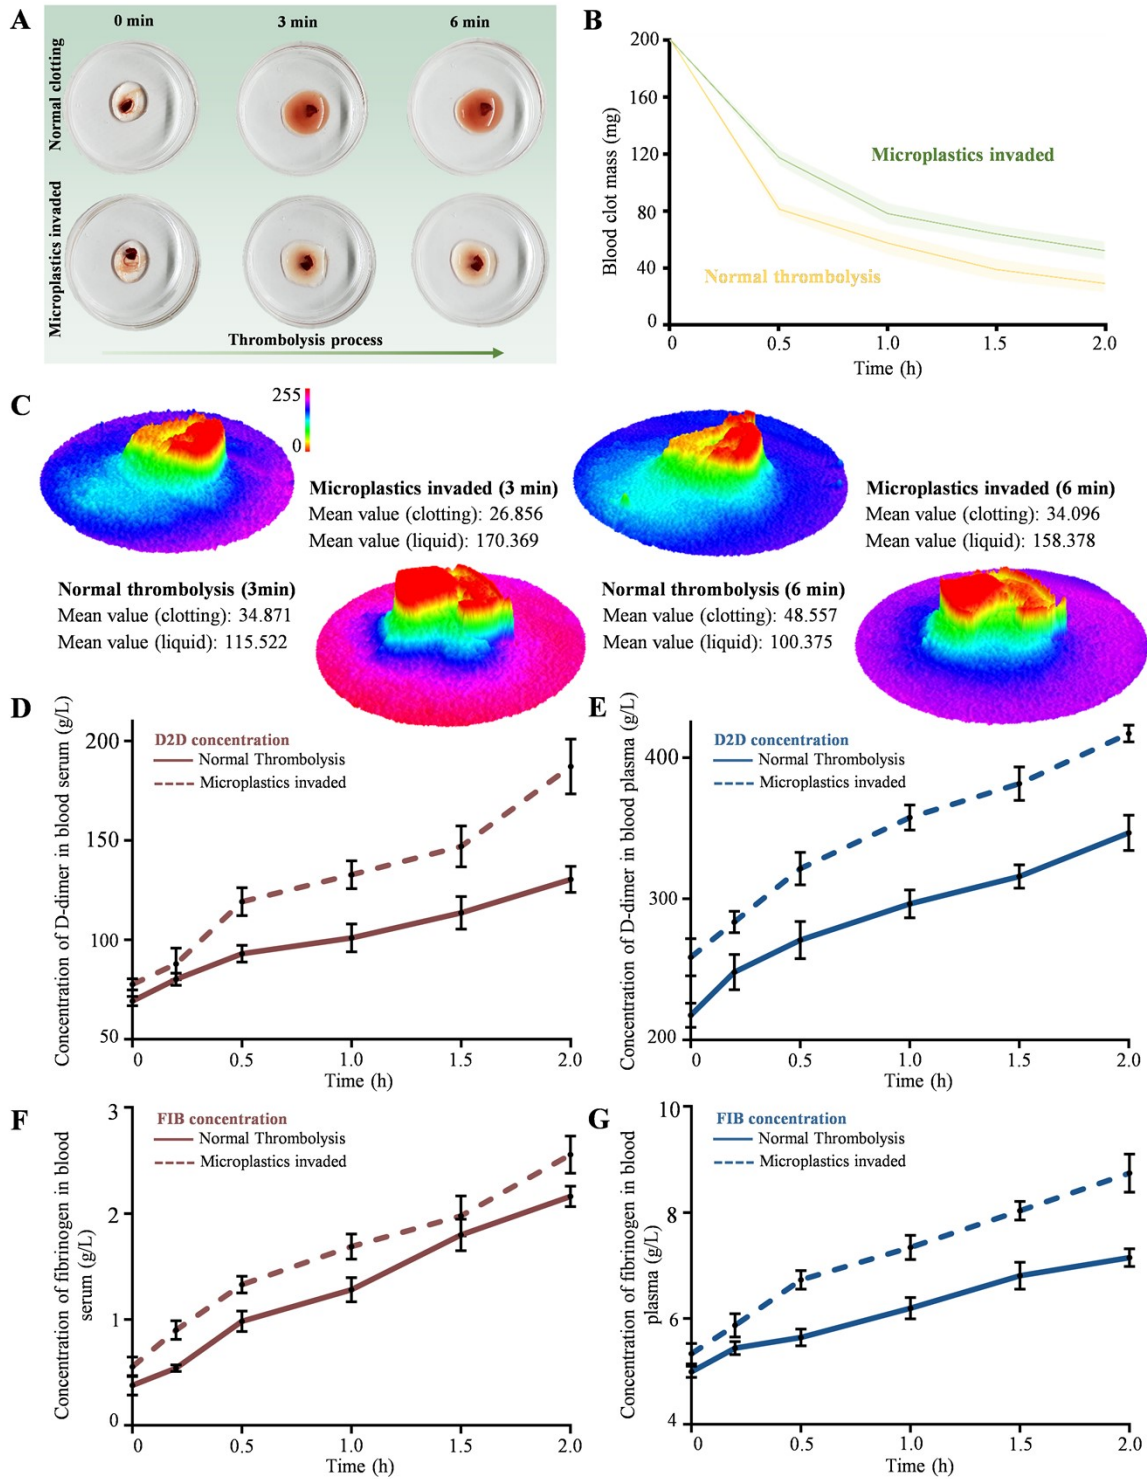

**Fig. S4.** The MPs effects on in-vitro thrombolysis and D-dimer, fibrinogen concentration analysis. (a) The in-vitro thrombolysis process of normal and MPs invasion. (b) The blood clotting mass of thrombolysis between normal and MPs invasion. (c) Three-dimensional light intensity distribution of normal thrombolysis and MPs invasion. (d-e) The D-dimer concentration analysis between normal and MPs invasion (blood serum, blood plasma). (f-g) The fibrinogen concentration analysis between normal and MPs invasion (blood serum, blood plasma).

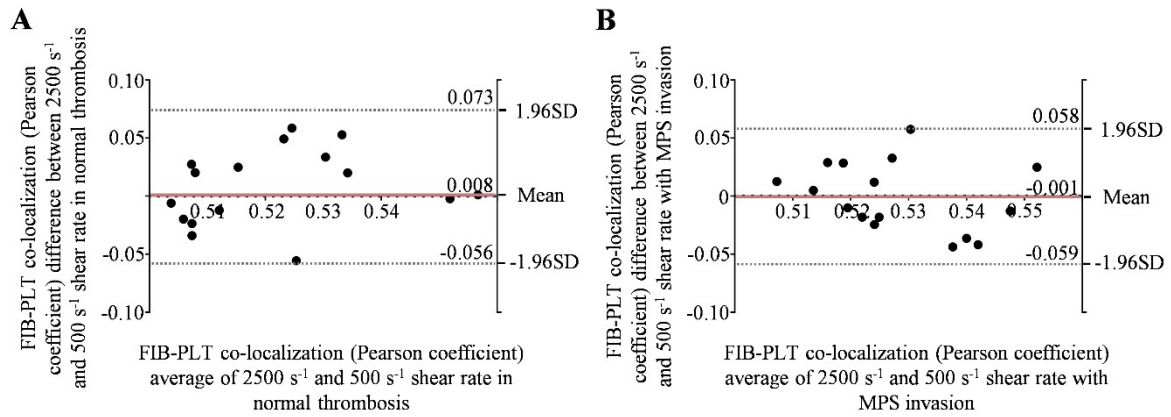

**Fig. S5.** The Bland–Altman analysis of FIB-PLT co-localization under different shear rate (normal, MPs invasion). (a) The Bland–Altman analysis to compare the FIB-PLT co-localization of normal thrombosis obtained by the 500 s<sup>-1</sup> and 2500 s<sup>-1</sup> shear rate. The red dashed line is the mean difference, and the gray dash lines represent the 95% LOAs. (b) The Bland–Altman analysis to compare the FIB-PLT co-localization of MPs invasion obtained by the 500 s<sup>-1</sup> and 2500 s<sup>-1</sup> shear rate.

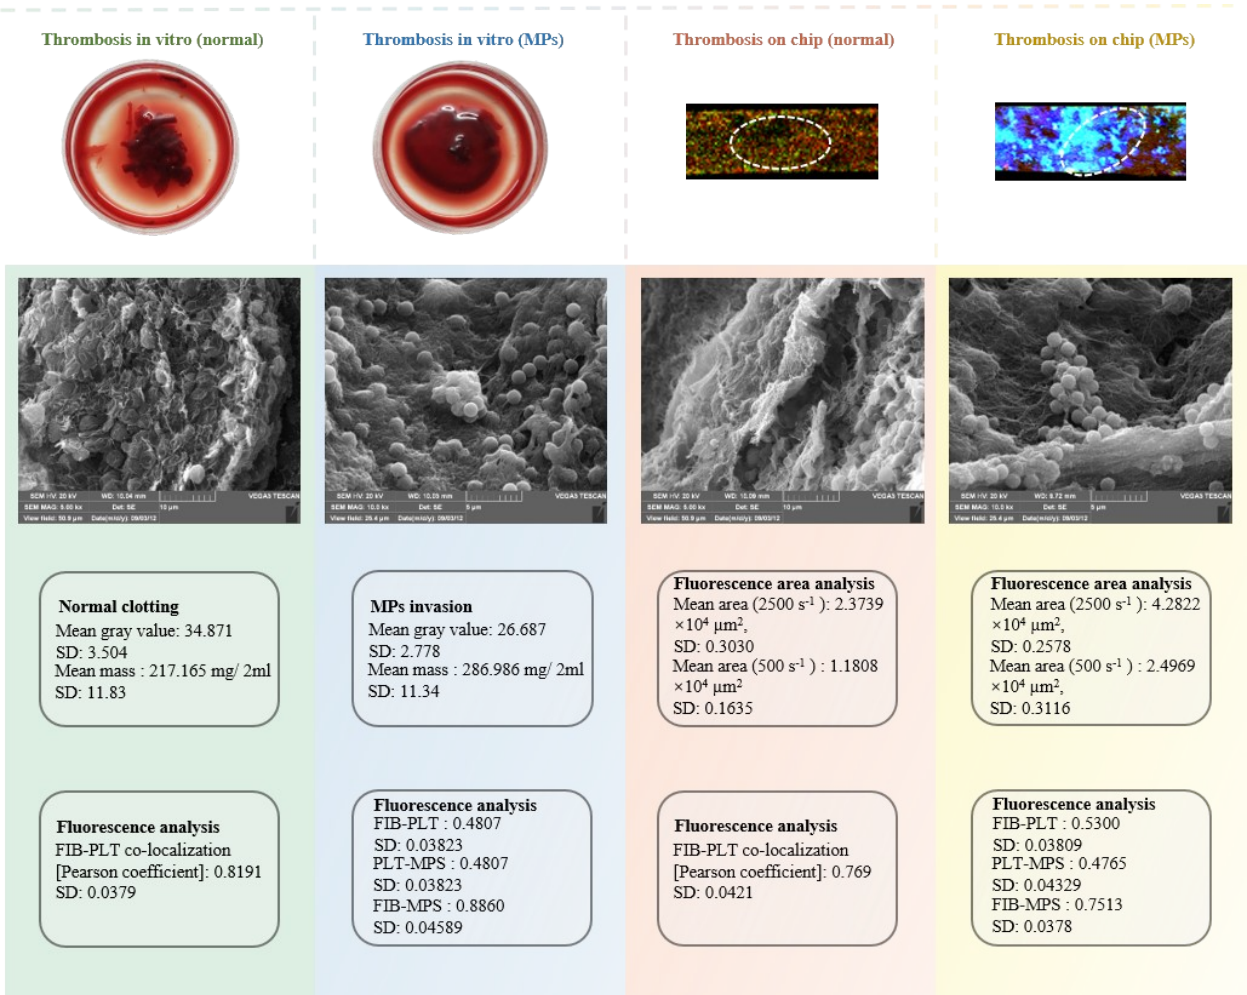

Fig. S6. The thrombus (mass, gray value, SEM, fluorescent area, fluorescent co-localization) analysis between thrombosis in vitro and on-chip.

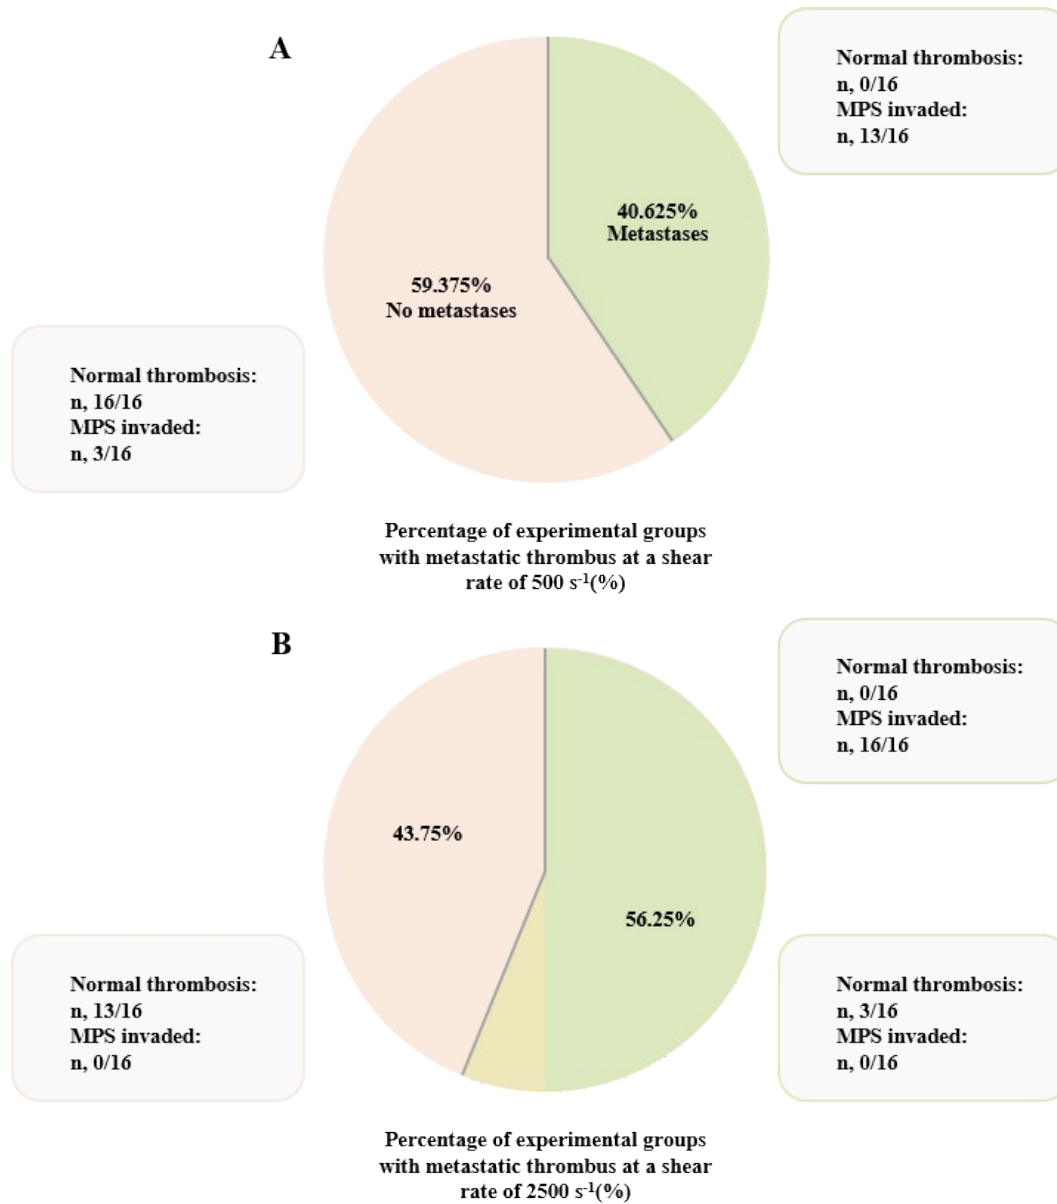

**Fig. S7.** The percentages of experimental groups accompanied by metastasis under different shear rate between normal thrombosis and MPs invasion.
